# Supplementary material
Source: Springer Nature journal article supplement (https://www.springermedizin.de/resource/supplementary/13063_2008_346_MOESM1_ESM.pdf/9618034)
Supplement: MOESM1 [file 9618034]

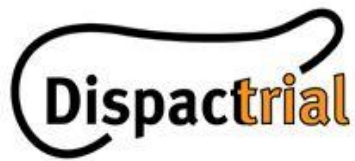

### Survey on peri-operative standards in distal pancreatectomy

In order to evaluate peri-operative standards within the DISPACT-Trial group we kindly ask you to fill out this questionnaire according to the local standards at your institution.

1. Bowel preparation  No  
 Enema  
 Orthograde lavage
  
2. Thoracic epidural catheter (TEC)  No  
 Yes  
  
Medication of TEC  Local anaesthetics  
 Local anaesthetics and opioids  
  
Duration of TEC (days)
  
3. Peri-operative single-shot antibiotic prophylaxis  No  
 Yes
  
4. Type of incision  Midline  
 Transverse
  
5. Post-operative care  Intermediate care unit until day \_\_\_\_\_  
 Intensive care unit until day \_\_\_\_\_  
 Nursery ward
  
6. Post-operative gastric tube  No  
 Yes until day \_\_\_\_\_
  
7. Intraabdominal drain  No  
 Yes until day \_\_\_\_\_

8. Post-operative feeding  Intravenous until day \_\_\_\_\_  
 Via gastric tube beginning day \_\_\_\_\_  
 Via jejunal tube beginning day \_\_\_\_\_  
 Oral (see below for further details)  
  
Oral, beginning with fluids at  Day of surgery  
 1<sup>st</sup> postoperative day (pod)  
 2<sup>nd</sup> pod  
 3<sup>rd</sup> pod  
\_\_\_\_\_ pod  
  
Oral, beginning with solid food at  Day of surgery  
 1<sup>st</sup> postoperative day (pod)  
 2<sup>nd</sup> pod  
 3<sup>rd</sup> pod  
\_\_\_\_\_ pod
  
9. First mobilisation out of bed at  Day of surgery  
 1<sup>st</sup> postoperative day (pod)  
 2<sup>nd</sup> pod  
 3<sup>rd</sup> pod  
\_\_\_\_\_ pod
  
10. Peri-operative somatostatin therapy  No  
 Yes until day \_\_\_\_\_
